# Supplementary material for: Effects of Allium hookeri Extracts on Hair-Inductive and Anti-Oxidative Properties in Human Dermal Papilla Cells
Source: MDPI journal article supplement (doi:10.3390/plants12091919), 2023-05-08

**Figure S1.** Effects of alliin on cell viability and hair-inductive properties genes in HDPCs. (A) HDPCs were treated with the indicated concentrations of alliin for 24 h and 48 h, respectively. Cell viability of HDPCs was measured via WST-1 assay. (B) mRNA level of hair-inductive genes (*VCAN*, *ALP*, and *FGF7*) was assessed via qRT-PCR and then normalized against *GAPDH*.

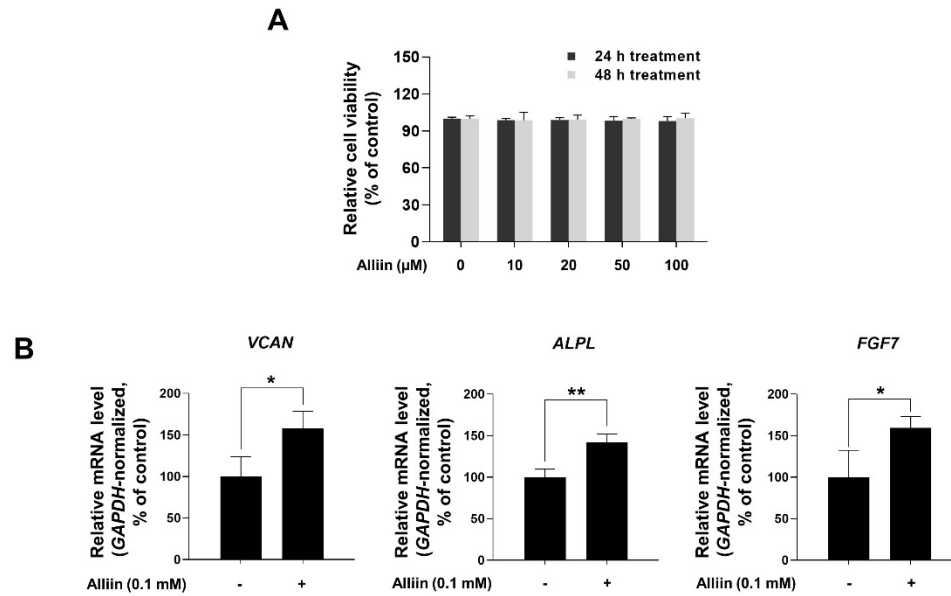

**Figure S2.** HDPCs were cotreated with 400  $\mu\text{g/mL}$  AHE with or without 50  $\mu\text{M}$  daphnetin for 24 h. The level of PKA/GSK3 $\beta$  signaling phosphorylation were assessed by western blotting and  $\beta$ -Actin served as a loading control.

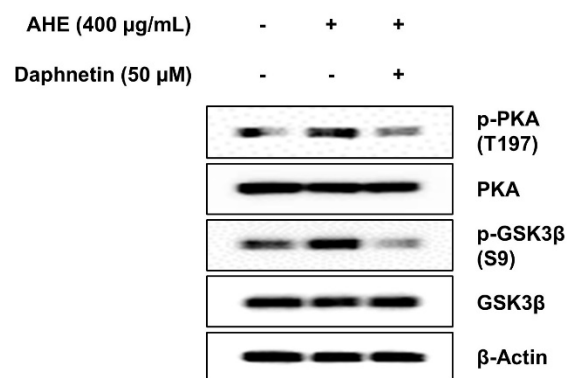

Supplement: s1 [file s1]
